# Supplementary material
Source: PubMed Central journal article supplement (PMC7081945)
Supplement: NIHMS1537679-supplement-1.pdf [file NIHMS1537679-supplement-1.pdf]

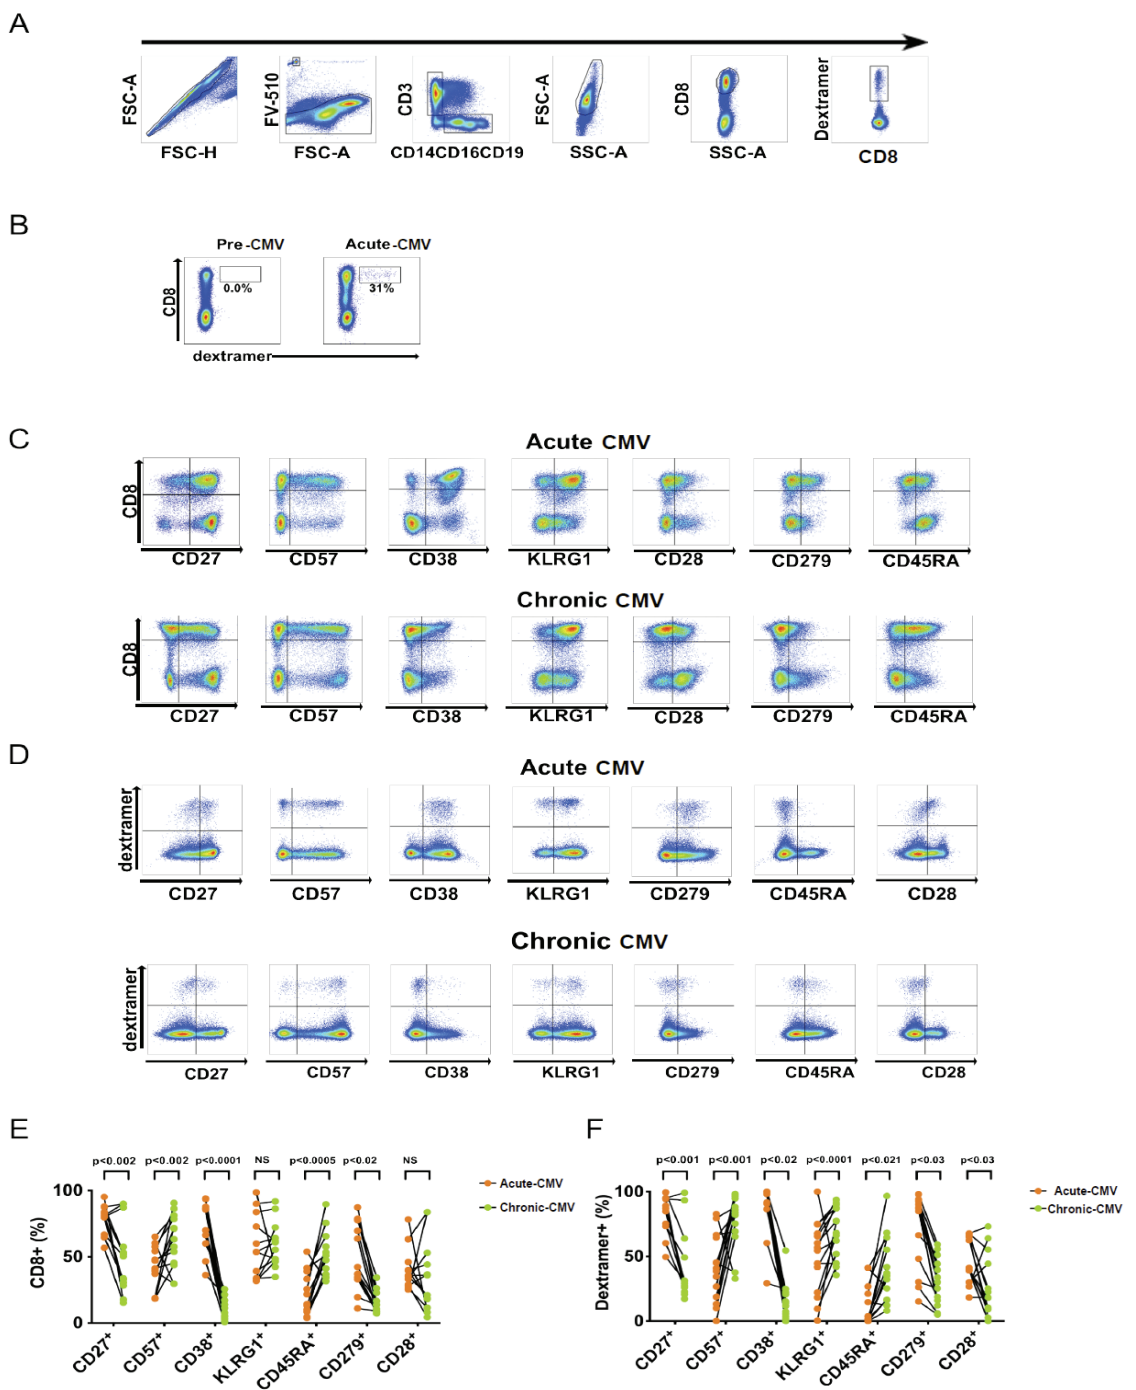

**Figure S1. Gating Strategy and extended phenotypic analysis of total and CMV-specific CD8<sup>+</sup> T cells during acute and chronic CMV infection**

(A) Shows gating strategy used in our flow cytometric analysis using FlowJo software. (B) Representative flow plots showing the CMV dexramer<sup>+</sup>CD8<sup>+</sup> cells from a patient at Pre-CMV (*left panel*) and acute CMV infection (*right panel*) time points. (C) Representative flow plots showing CD8<sup>+</sup> T cells frequencies of phenotypic markers: CD27<sup>+</sup>, CD57<sup>+</sup>, CD38<sup>+</sup>, KLRG1<sup>+</sup>, CD28<sup>+</sup>, CD279<sup>+</sup> and CD45RA<sup>+</sup> in a patient during acute CMV infection (*upper panels*) and during Chronic CMV infection (*lower panels*). (D) Representative flow plots shows frequencies of CMV dexramer<sup>+</sup>CD8<sup>+</sup> cells of the same phenotypic markers: CD27<sup>+</sup>, CD57<sup>+</sup>, CD38<sup>+</sup>, KLRG1<sup>+</sup>, CD28<sup>+</sup>, CD279<sup>+</sup> and CD45RA<sup>+</sup> in a patient during acute CMV infection (*upper panels*) and during Chronic CMV infection (*lower panels*) time points. (E)(F) Cumulative data shows frequencies of total CD8<sup>+</sup> T cells (E) or CMV Dexramer<sup>+</sup> CD8<sup>+</sup> (F) of phenotypic markers: CD27<sup>+</sup>, CD57<sup>+</sup>, CD38<sup>+</sup>, KLRG1<sup>+</sup>, CD279<sup>+</sup> and CD28<sup>+</sup> in patients during acute CMV infection (*orange circles*) and during Chronic CMV infection (*green circles*). Statistical analysis was performed using Wilcoxon matched pair signed rank test and p value of less than 0.05 considered statistically significant.

A

**Predicted T-bet binding Sites  
KLRG1 Promoter**

|    | start | end  | score     | strand |
|----|-------|------|-----------|--------|
| 1  | 493   | 502  | 6.017168  | +      |
| 2  | 676   | 685  | 1.808007  | +      |
| 3  | 1017  | 1026 | 9.805924  | +      |
| 4  | 240   | 249  | 2.104591  | -      |
| 5  | 368   | 377  | 3.915415  | -      |
| 6  | 505   | 514  | 5.799985  | -      |
| 7  | 538   | 547  | 5.801434  | -      |
| 8  | 697   | 706  | 7.413181  | -      |
| 9  | 744   | 753  | 2.136272  | -      |
| 10 | 944   | 953  | 6.354060  | -      |
| 11 | 1217  | 1226 | 13.406233 | -      |

B

**Predicted T-bet binding Sites  
B3GAT1 (CD57) Promoter**

|   | start | end | score    | strand |
|---|-------|-----|----------|--------|
| 1 | 654   | 663 | 4.771764 | +      |
| 2 | 441   | 450 | 4.859813 | -      |

C

```

GCCTTGTGTGCTTGCATGTGTTGATTTTGATTGGAGAGTAAGTCTAATGCCATTCTGTCATGGC
TGGAAAGCAGAAATATATTTGTTTTTATAATATAAAACAAATTAATATAAAGCACTCCCTGTTTCTCTTC
TTTTATCCTTATGCAGCTATCTTGATGATCTTATCCACTCTTAAGAGTTTCAATACTCTTTCTGTTTC
CTTACTTTAACTTTTGTTTTTTTAGACGGAGTTTCACTCTTGTGCCAGGCTAGATAGAGTACAAT
GGTGCAGTCTGGGCTCGCTGCAACCTCCGCCTCCCGGTTTCAAGCCATTCTCCTGCCTCAGCCT
CCTGAGCAGCTGAGATTACAGCCCCCACCACCACACCAGCTAATTTTTTTGATTTTTAGTAGAG
ACGGGGTTTACCATTGTTGGCCAGGCTGGTCTTGAATTCCTGACCTGAGGTGATCCACCCTGCTT
GGCCTCCCAAAGTCTGGGATTACAGCCGTGAGCCACCACACCTGGCCTACTCTAACTTTTTTATTA
ACTTTTCACCTACTAAAAACAAATTAAGATGTTAGAATGATTTGTTTACTTTGCTCTTTTTTA
GTTATCTTTGCATGAAGTATAATAATAAAAAAATAAGACAACAAAGAGAAAAATATAATGGAATTC
TGATACTGTGAAGGGTAAAGACCATCACACAATTTGGACAAGGTTTTGGGGAGATGTGGTCATGTC
ATATTCACAAAATATATCTGGGTAATAGTCTATTTCTCCCGTGATTCCAGGCATATGCACCCAACAGT
CCATTTCTGTTATTGCTTATCACTGCCAAAAGTTCCAAGAAATGATGAAGTCAGTCTCATTGGCAT
ACATCTACTTTTTTCAGAAGGAAACAAAGCAGAGAAAAAATCCGAGAGAAATTCATAGCTAGTAACC
ACTCTCACTTTTATTTTATTTCCATAACTGAAATTGCTGGACTTGAGAGCAATTTTCCCTTGCTCAA
CAGAATTAGGTGAGATCGGGAATCAATTTAATATATTTAGTGAGCATCTACAGTGTTCATGGGGCA
AAAAAATAGCAACTTACAATATTAATTTCTATAGGCAGCCCCCAAATTTGAATCATTTCCTGAAAAATT
ACTTCTGCTTTTGTGAAGTTTCTGCTAGCAGTTTAGAGATTGGGCTGTTTCTCCTCACTGATACATAT
CTTCACACTTCTATAATTTAACTCTCTCAACTGCAITGTGAAAGATCTTAGCTGAAGATG
    
```

**Figure S2. Predicted T-bet binding sites for KLRG1 and CD57 promoters.**

(A) Predicted T-bet binding sites using *KLRG1* promoter using a consensus T-bet DNA binding matrix and a transcription factor binding site analysis tool (TFBS tools) and identified the T-bet binding site with the highest TFBS score (B) Lack of predicted T-bet binding sites for *B3GAT1* (CD57) promoter. (C) Targeted T-bet binding sites in the *KLRG1* promoter

**Supp. Table I.**

**CMV dextramer CD8<sup>+</sup> T cell MHC Class I matches assessed during CMV infection**

| CD8 <sup>+</sup> Class I Dextramers | Ethnicity      | A*01                                          | A*02                | B*07                 | B*08               |
|-------------------------------------|----------------|-----------------------------------------------|---------------------|----------------------|--------------------|
|                                     |                | VTEHDTLLY <sup>2</sup><br>(pp50) <sup>3</sup> | NLVPMVATV<br>(pp65) | TPRVTGGGAM<br>(pp65) | ELRRKMMYM<br>(IE1) |
| <b>LTR</b>                          |                |                                               |                     |                      |                    |
| <b>Controllers</b>                  |                |                                               |                     |                      |                    |
| 28                                  | W <sup>1</sup> |                                               | +                   |                      |                    |
| 34                                  | W              | +                                             |                     |                      | +                  |
| 37                                  | W              |                                               | +                   |                      |                    |
| 41                                  | W              |                                               | +                   | +                    |                    |
| 51                                  | W              | +                                             |                     | +                    |                    |
| <b>LTR</b>                          |                |                                               |                     |                      |                    |
| <b>Relapsers</b>                    |                |                                               |                     |                      |                    |
| 24                                  | W              | +                                             |                     |                      |                    |
| 29                                  | W              |                                               |                     | +                    |                    |
| 33                                  | W              |                                               | +                   |                      |                    |
| 46                                  | W              | +                                             |                     |                      | +                  |
| 53                                  | W              | +                                             |                     |                      | +                  |

<sup>1</sup>W=white

<sup>2</sup>HLA Class I dextramer and cognate peptide

<sup>3</sup>CMV antigen

**Supp. Table II.**

**List of Primers used for ChIP Assay**

| <b>Target</b>    | <b>Forward</b>               | <b>Reverse</b>                |
|------------------|------------------------------|-------------------------------|
| KLRG1            | AGCATCTACAGTGTCATGGGG        | GATTCAAATTTGGGGGCTGCCT        |
| CD57<br>(B3GAT1) | AGCAGACCCCGTGAAACCCC         | AGTTAAAGCTCGGCCCCC            |
| IFN $\gamma$     | TACCAGGGCGAAGTGGGAGG         | CACCTGTGCCATTCTGGTGGG         |
| IL-4             | CCAAGTGACTGACAATCTGGGTAACGAA | AATAGGTGTCGATTTGCAGTGACAATGTG |
| GAPGH            | TCCTTCTGTTTCATCCAAGC         | TACTAGCGGTTTTACGGGCG          |
